# Supplementary material for: Performance in even a simple perceptual task depends on mouse secondary visual areas
Source: eLife journal article supplement (doi:10.7554/elife.62156), 2021-02-01

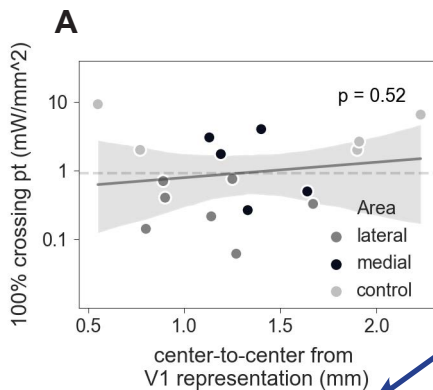

Location between LM and V1 produces smaller effect

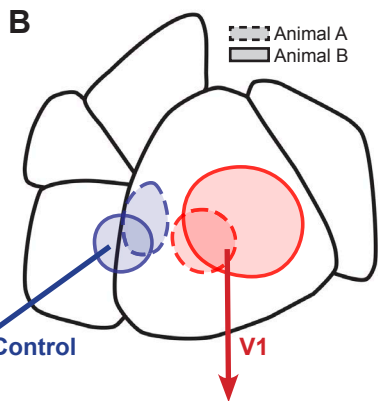

Inhibition of V1 in same animals degrades behavior

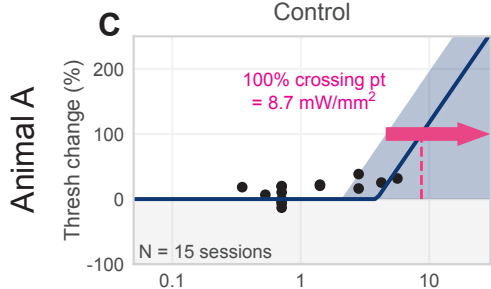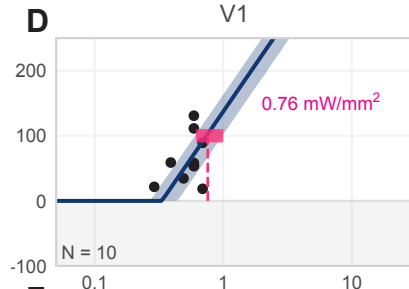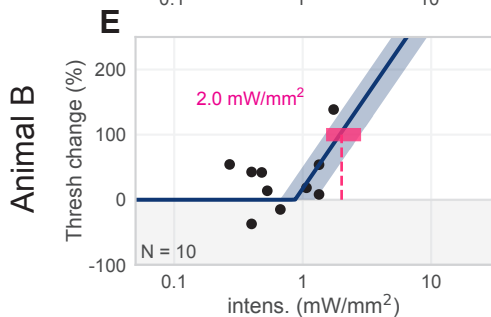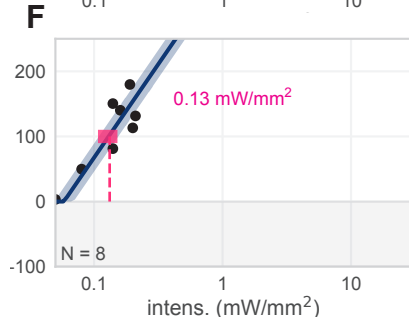

Supplement: supp [file elife-62156-supp-v1.zip]
