# Supplementary material for: Performance in even a simple perceptual task depends on mouse secondary visual areas
Source: eLife journal article supplement (doi:10.7554/elife.62156), 2021-02-01

**A**

spatial extent of direct vs.  
feedback inhibition  
(VGAT-ChR2)

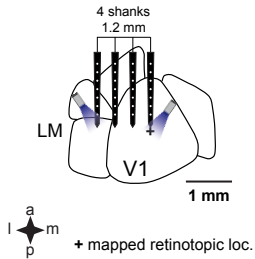**B**

V1 inhibition  
**direct** effects on V1

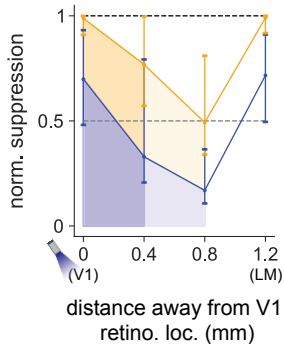**C**

LM inhibition  
**feedback** effects on V1

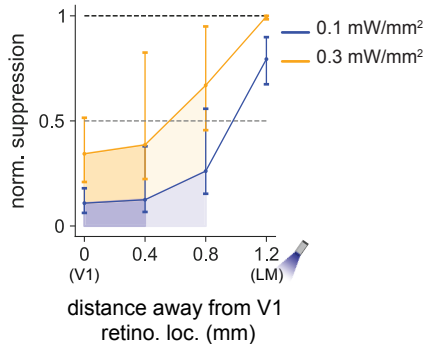

Supplement: supp [file elife-62156-supp-v1.zip]
