# Supplementary figures and images for: Performance in even a simple perceptual task depends on mouse secondary visual areas
Source: eLife journal article supplement (doi:10.7554/elife.62156), 2021-02-01

**A**

# measure visual responses

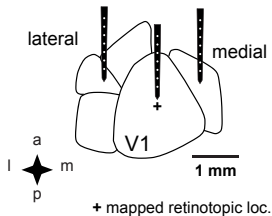**B**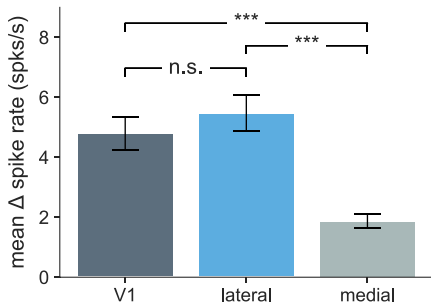**C**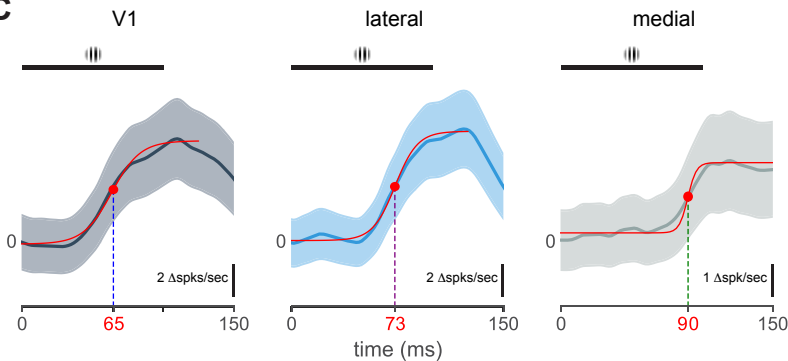

Supplement: supp [file elife-62156-supp-v1.zip]

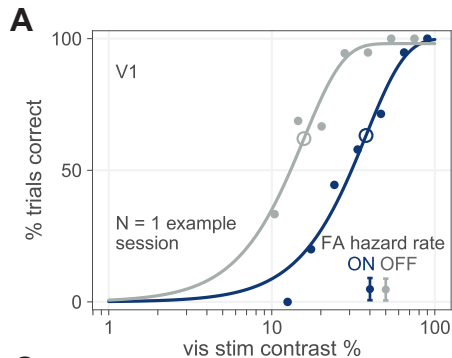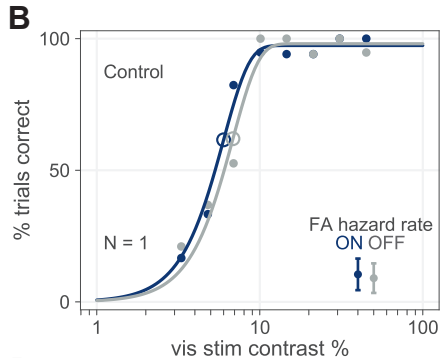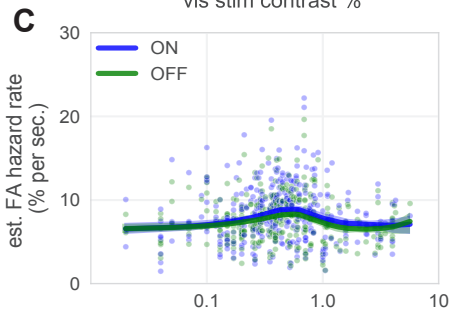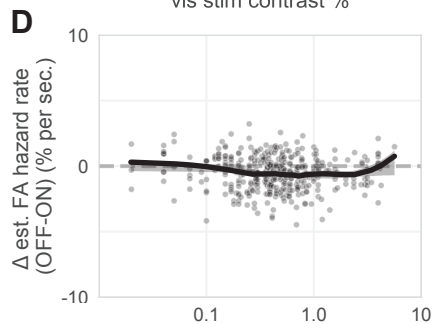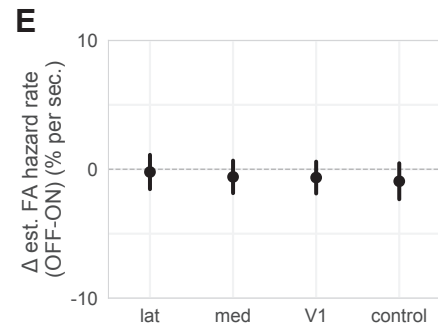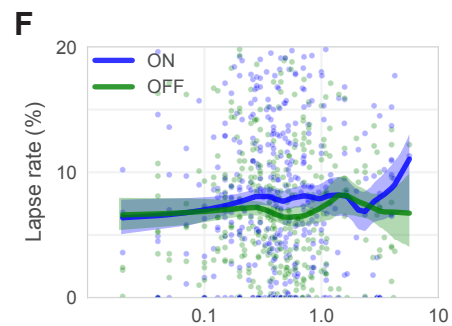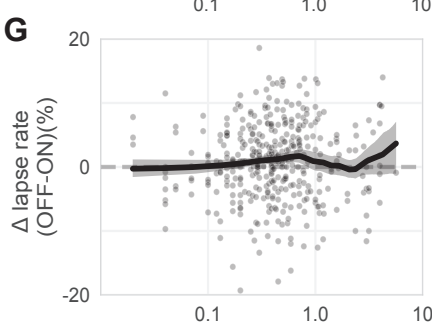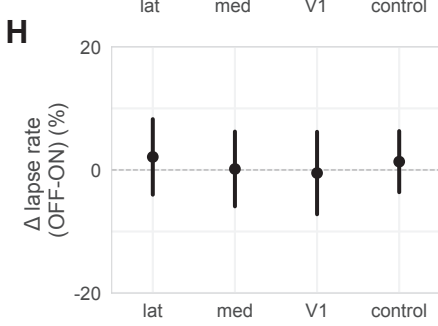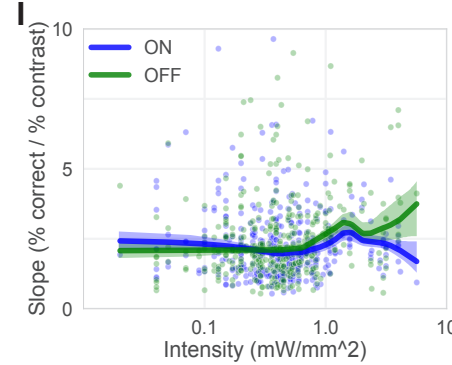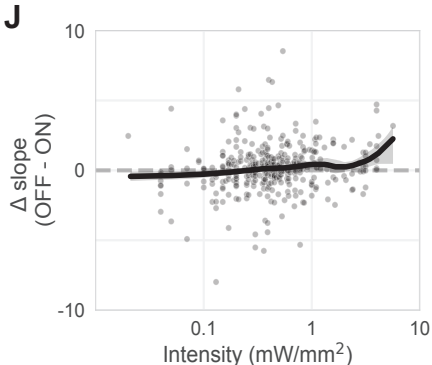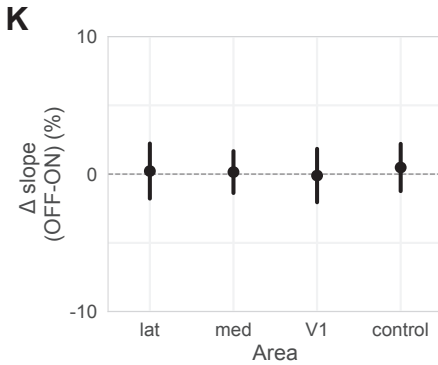

Supplement: supp [file elife-62156-supp-v1.zip]

**A** Ipsilateral Control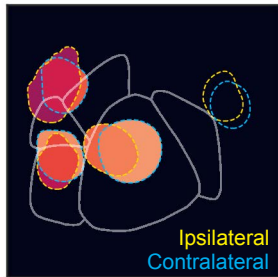**B**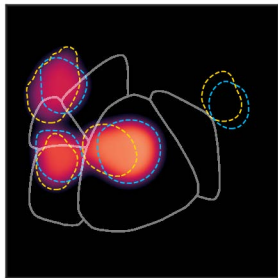**C**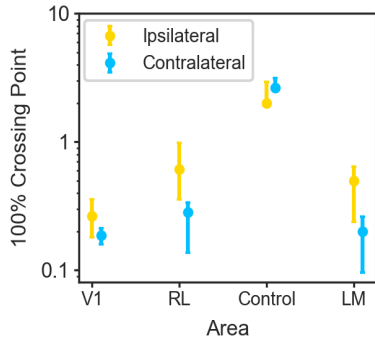

Supplement: supp [file elife-62156-supp-v1.zip]

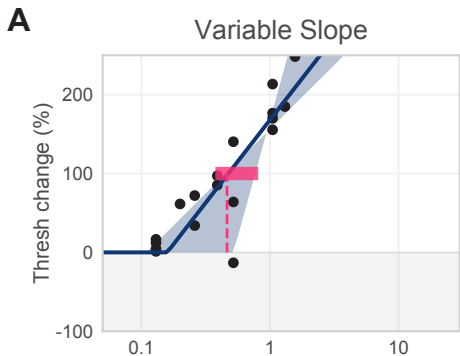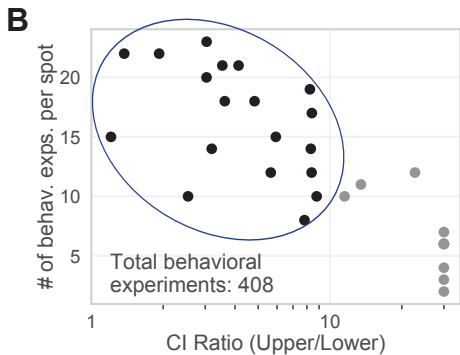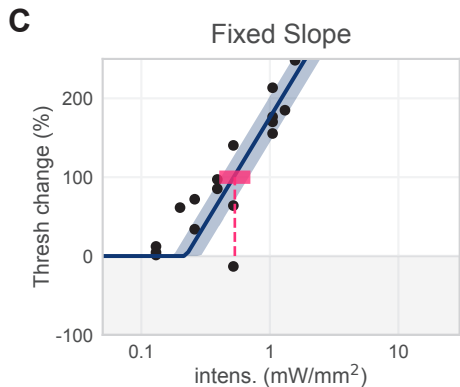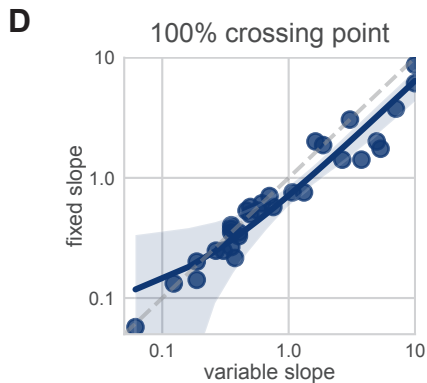

Supplement: supp [file elife-62156-supp-v1.zip]

**A**

Azimuth, from  
retinotopic map\*

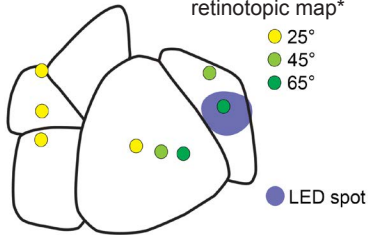

\*Zhuang et al., 2017

**B**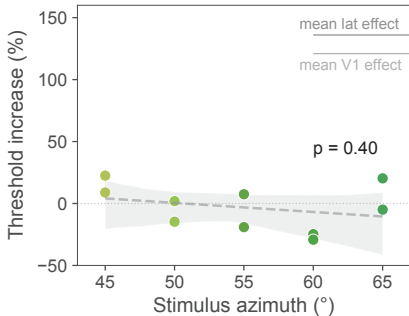

Supplement: supp [file elife-62156-supp-v1.zip]

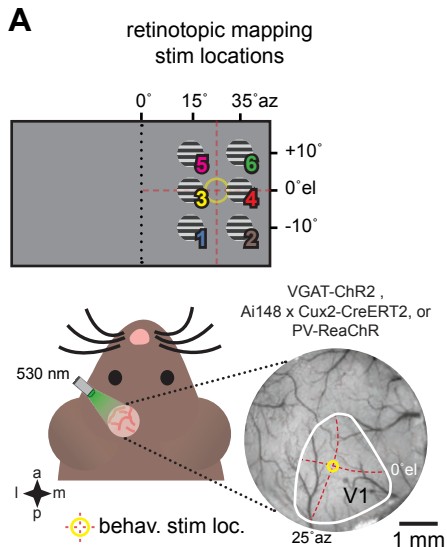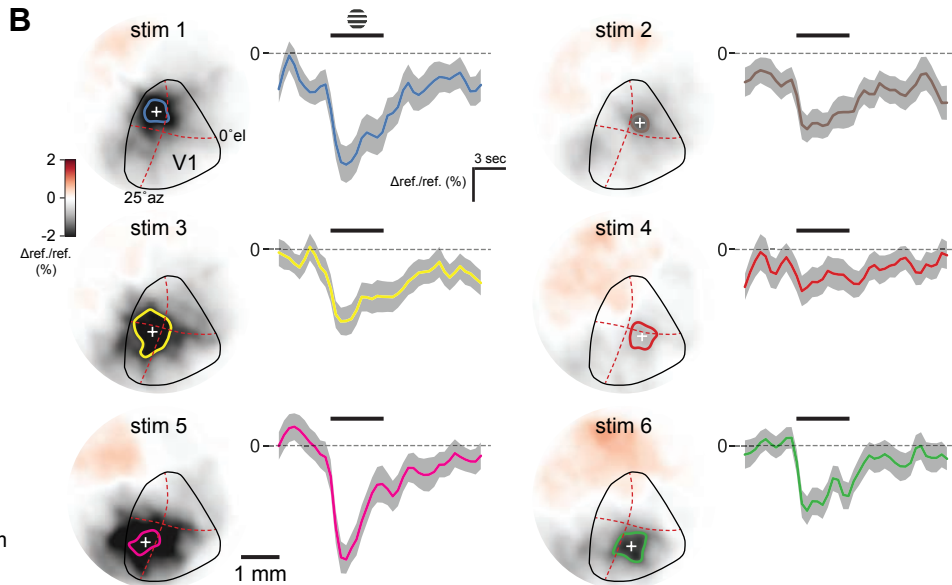

**C** hemo. intrinsic map fit with HVAs

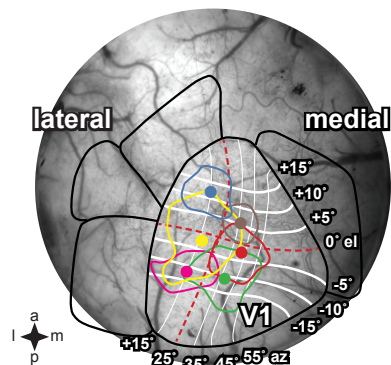

**D** behav. stim GCaMP resp.  
3 frame avg. (300 ms)

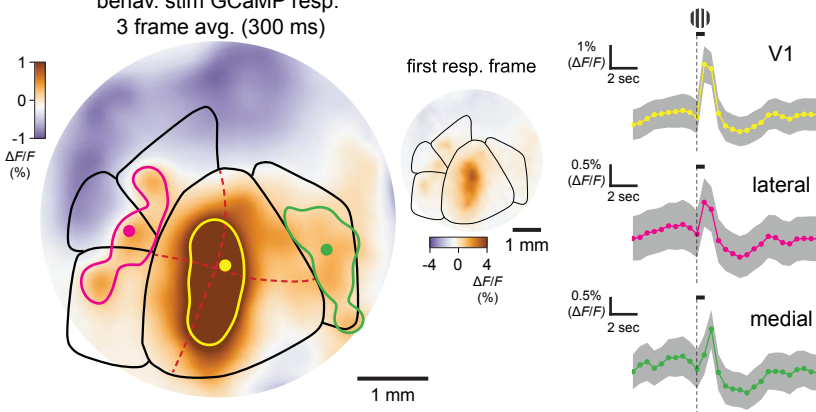

Supplement: supp [file elife-62156-supp-v1.zip]

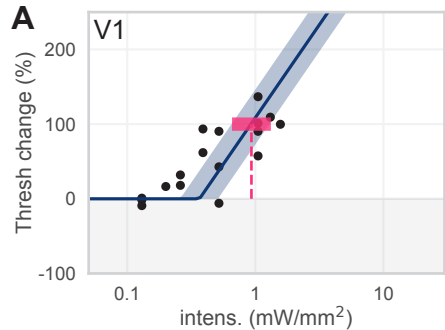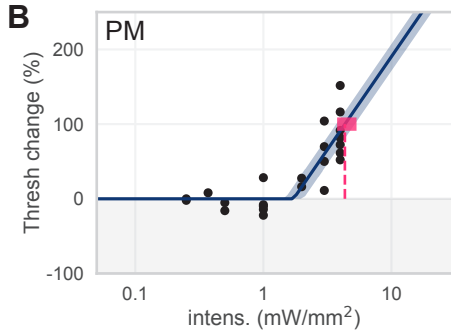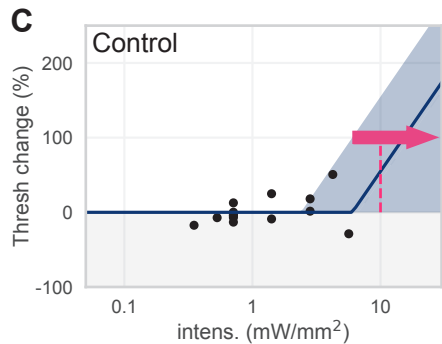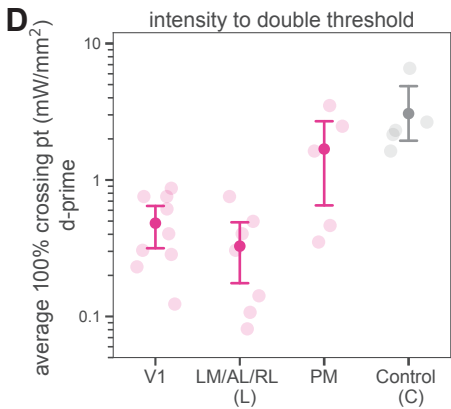

Supplement: supp [file elife-62156-supp-v1.zip]

# A ISN effects (Direct Inhibition)

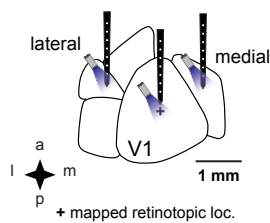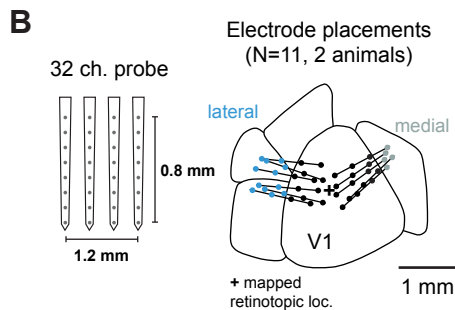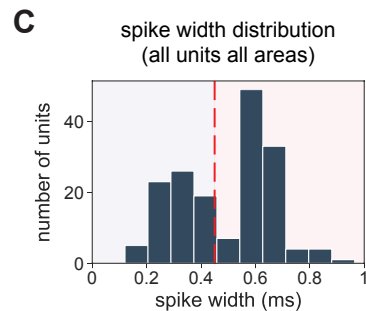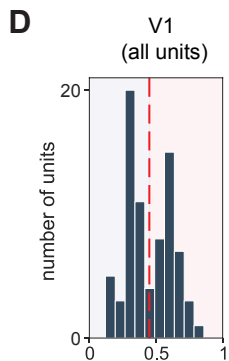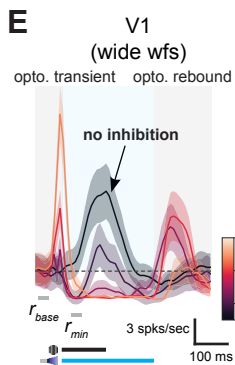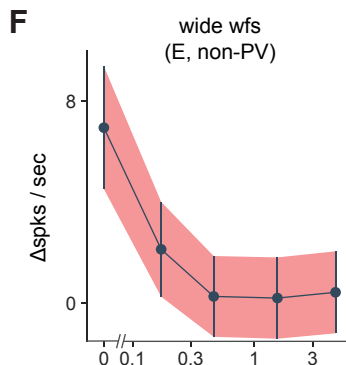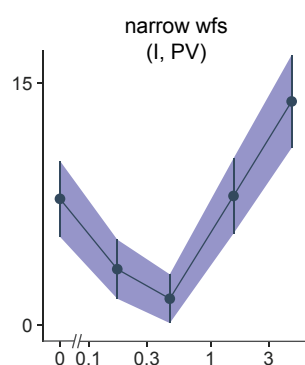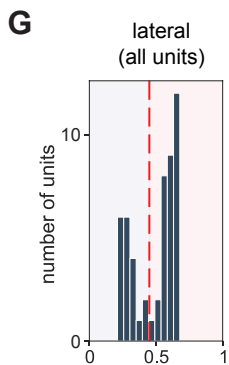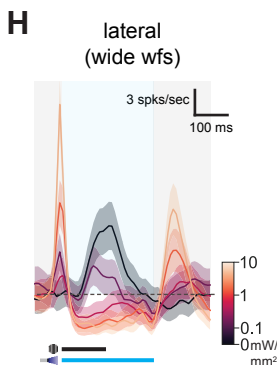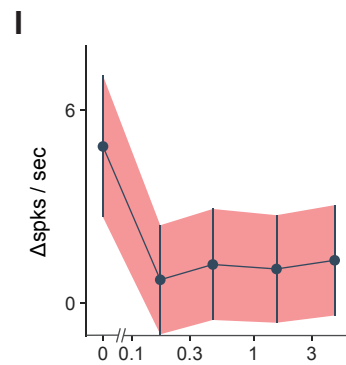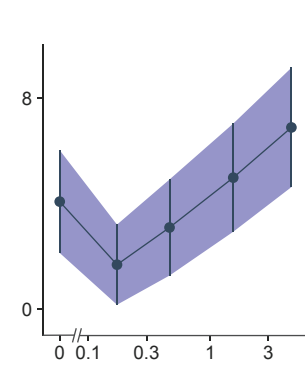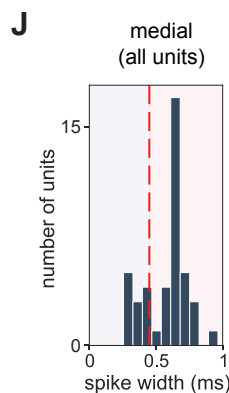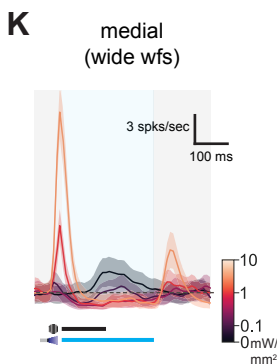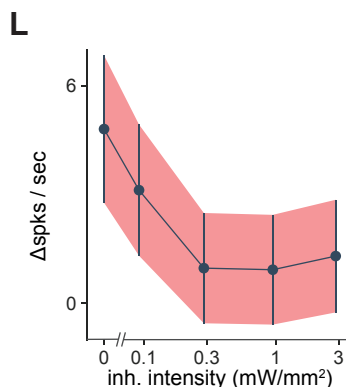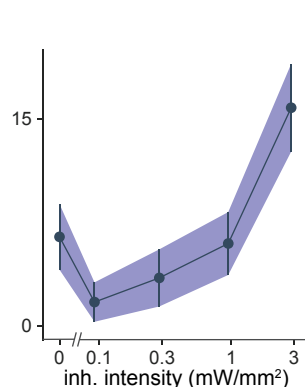

Supplement: supp [file elife-62156-supp-v1.zip]

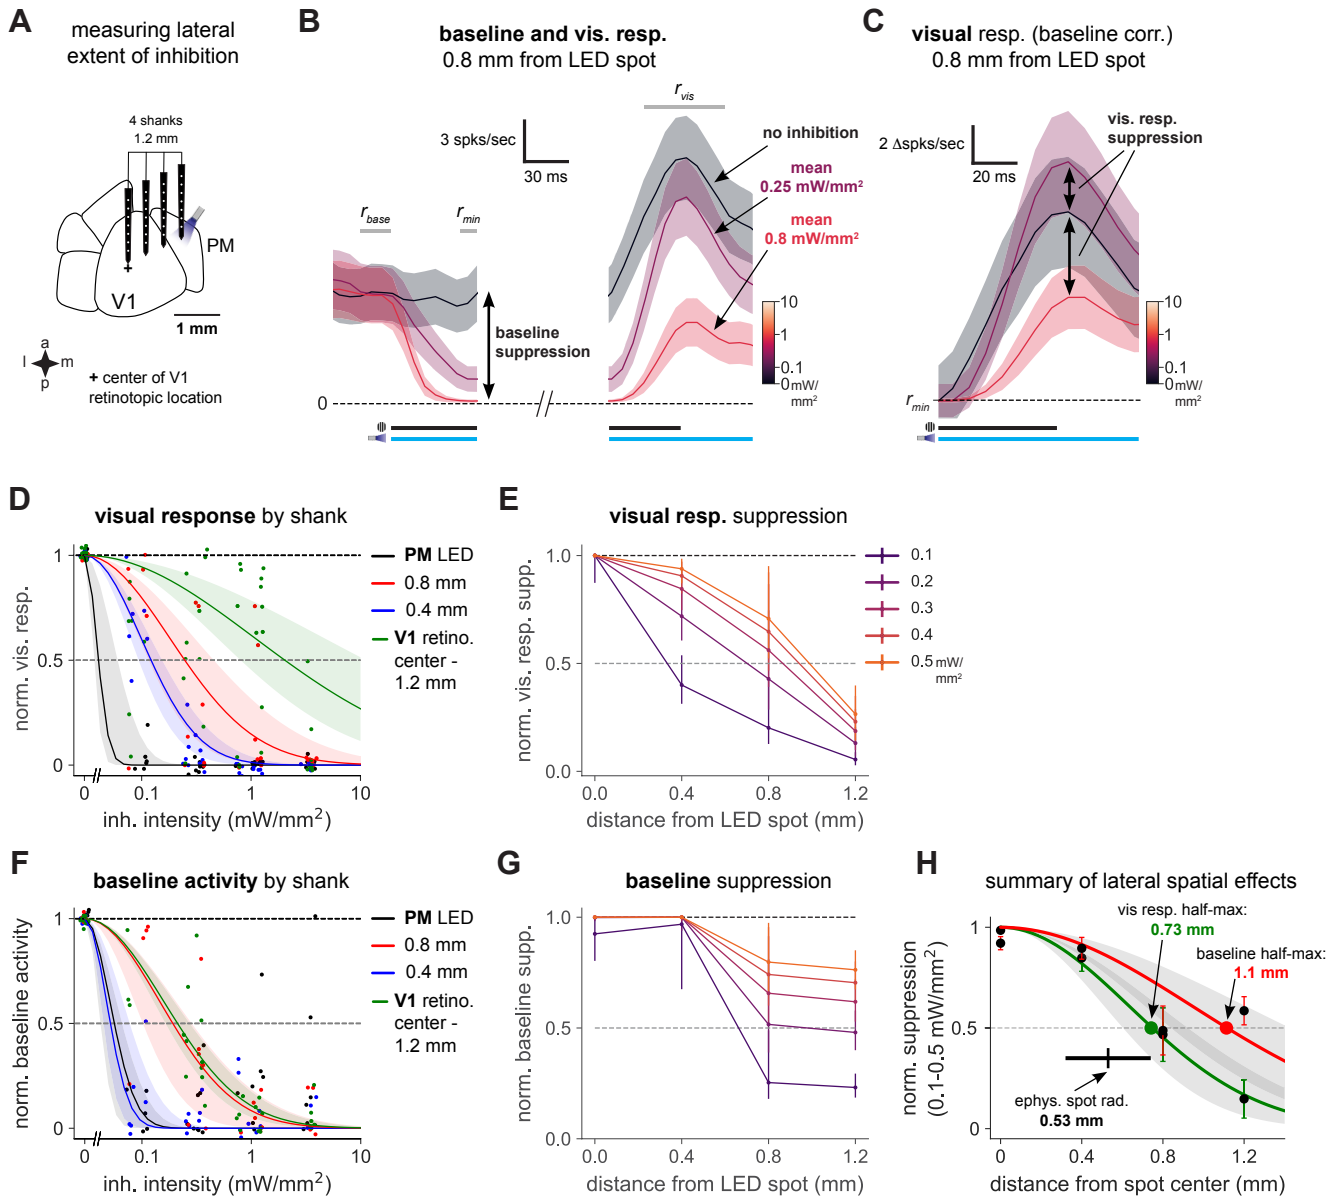

Supplement: supp [file elife-62156-supp-v1.zip]

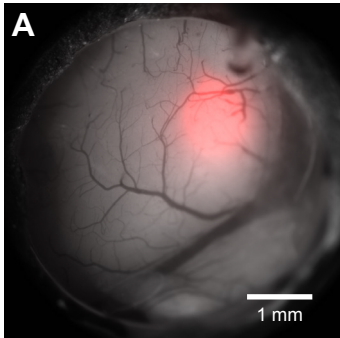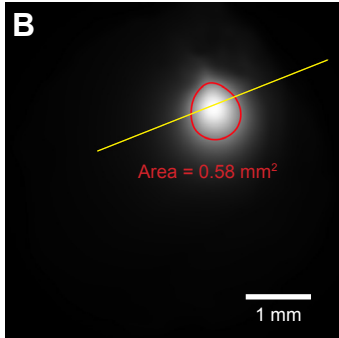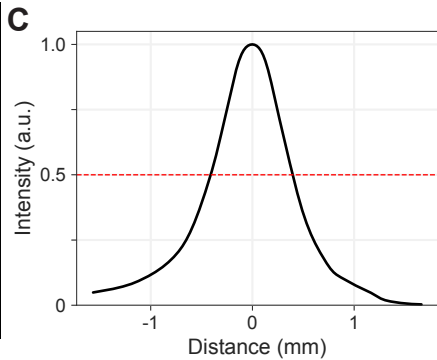

Supplement: supp [file elife-62156-supp-v1.zip]
